# Supplementary material for: STING-induced blood-brain barrier opening combined with radiotherapy potentiates antitumor response in a high-grade glioma model
Source: JCI journal article supplement (doi:10.1172/jci198843), 2026-02-15

Full unedited gel for Figure 5A

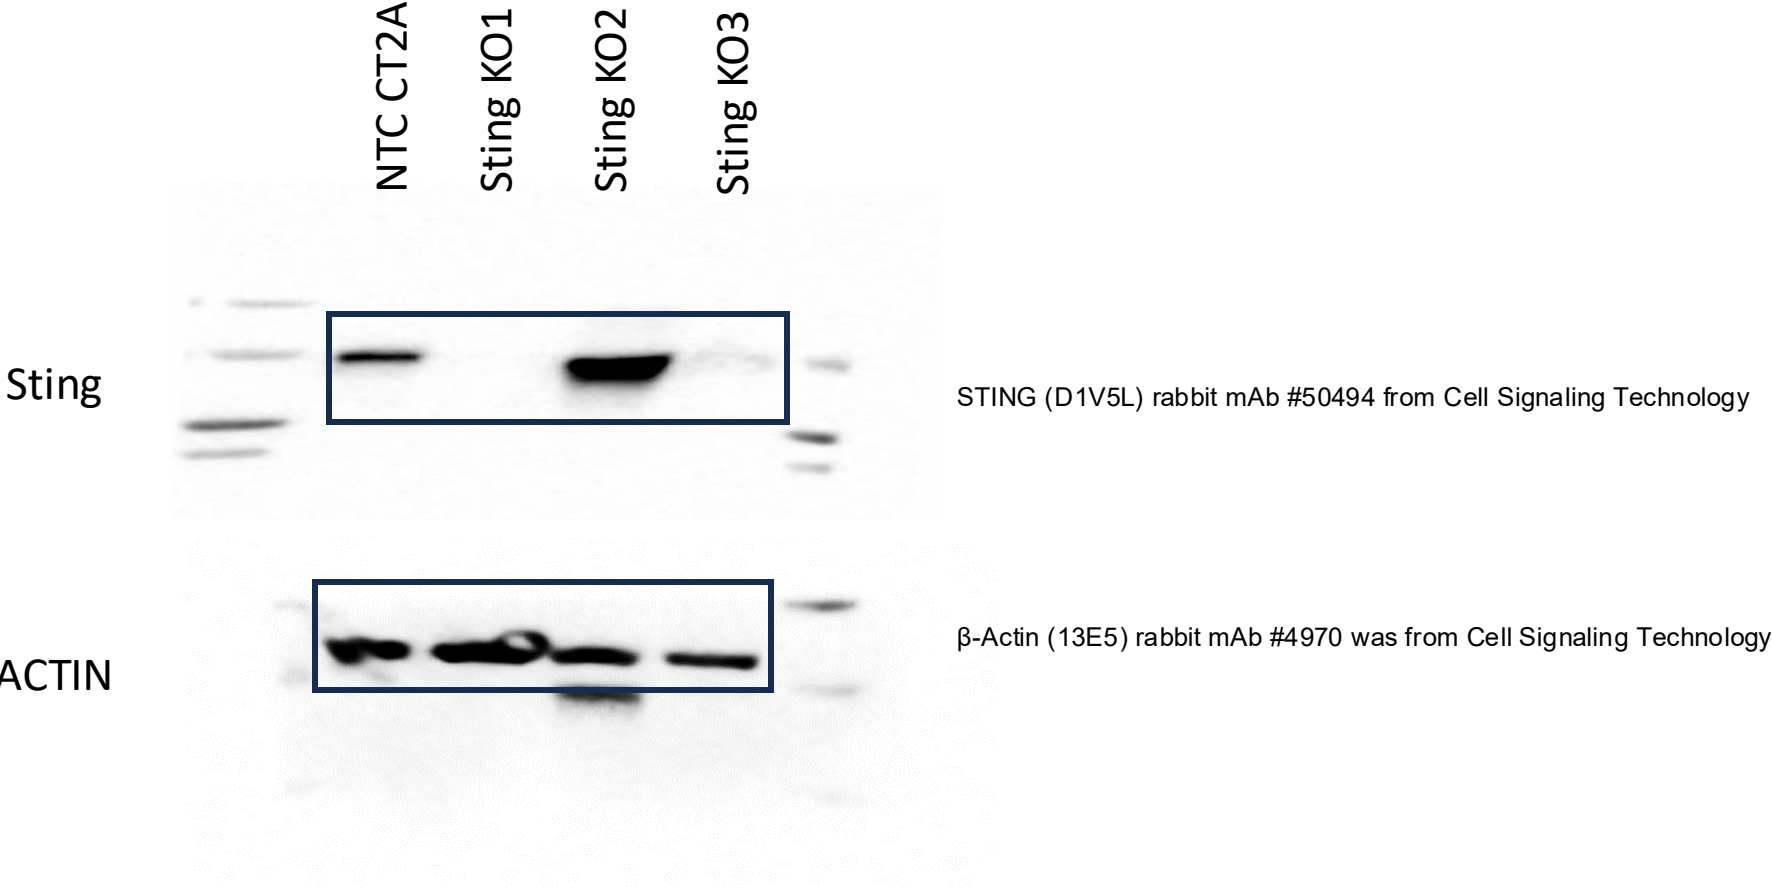

Supplement: sd2 [file 2]
